# Supplementary material for: Hypoxia-induced LINC00674 facilitates hepatocellular carcinoma progression by activating the NOX1/mTOR signaling pathway
Source: PubMed Central journal article supplement (PMC9475361; doi:10.7150/jca.76458), 2022-08-29
Supplement: jcav13p3177s1.pdf [file jcav13p3177s1.pdf]

**Supplementary Table 1 The primer sequences used in this study**

| <b>Gene</b> | <b>Primer</b> | <b>Sequence (5'-3')</b>  |
|-------------|---------------|--------------------------|
| LINC00674   | forward       | GAGCACGTCCACATAGCTGA     |
|             | reverse       | TGGA CT CCTAGCAGGAGCAT   |
| NOX1        | forward       | GTTTTACCGCTCCCAGCAGAA    |
|             | reverse       | GGATGCCATTCCAGGAGAGAG    |
| 18S         | forward       | CGGCGACGACCCATTCGAAC     |
|             | reverse       | GAATCGAACCCCTGATTCCCCGTC |
| HRE-1       | forward       | TGTTTTCTGGCTGGACACAG     |
|             | reverse       | CCACCACACCTGGCTAACTT     |
| HRE-2       | forward       | CTTAAATTGTGCCACCACCA     |
|             | reverse       | GGCTGAGGAAAGTGAGCCTA     |

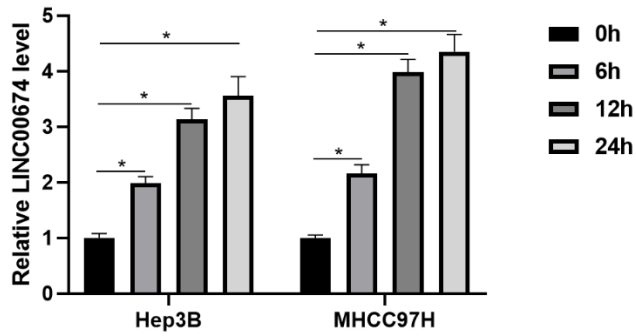

**Supplementary Figure 1** The level of LINC00674 in Hep3B and MHCC97H cells under hypoxic conditions at different time points.

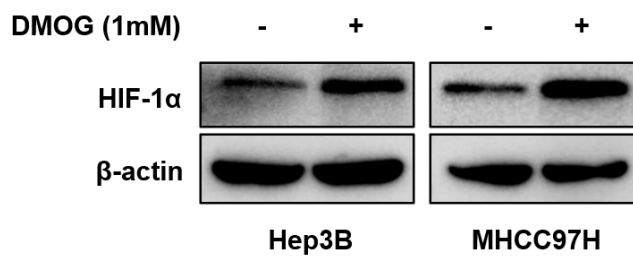

**Supplementary Figure 2** The level of HIF-1 $\alpha$  in Hep3B and MHCC97H cells with or without DMOG (1mM) treatment.

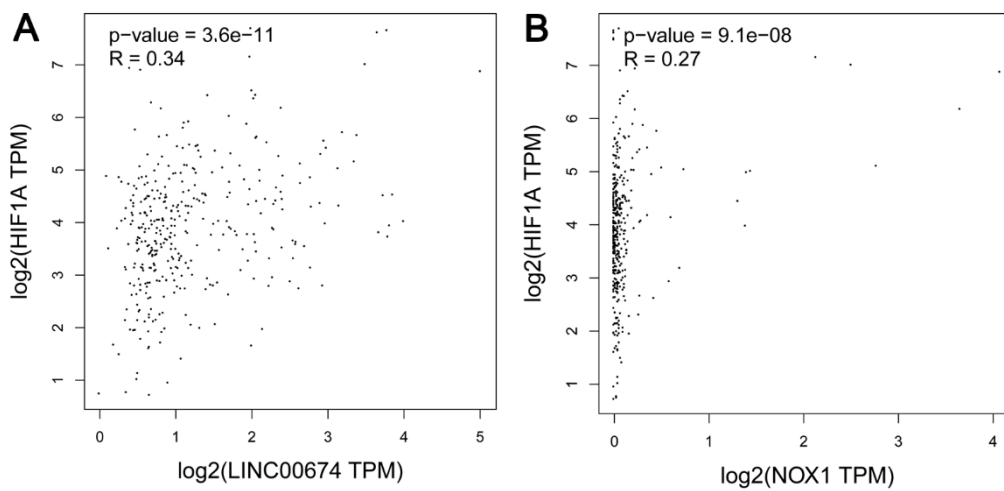

**Supplementary Figure 3** The correlations between HIF-1 $\alpha$  mRNA and LINC00674/NOX1 mRNA in HCC tissues from TCGA database. (A) HIF-1 $\alpha$  mRNA was positively correlated with LINC00674 expression in HCC tissues. (B) HIF-1 $\alpha$  mRNA was positively correlated NOX1 mRNA level in HCC tissues.

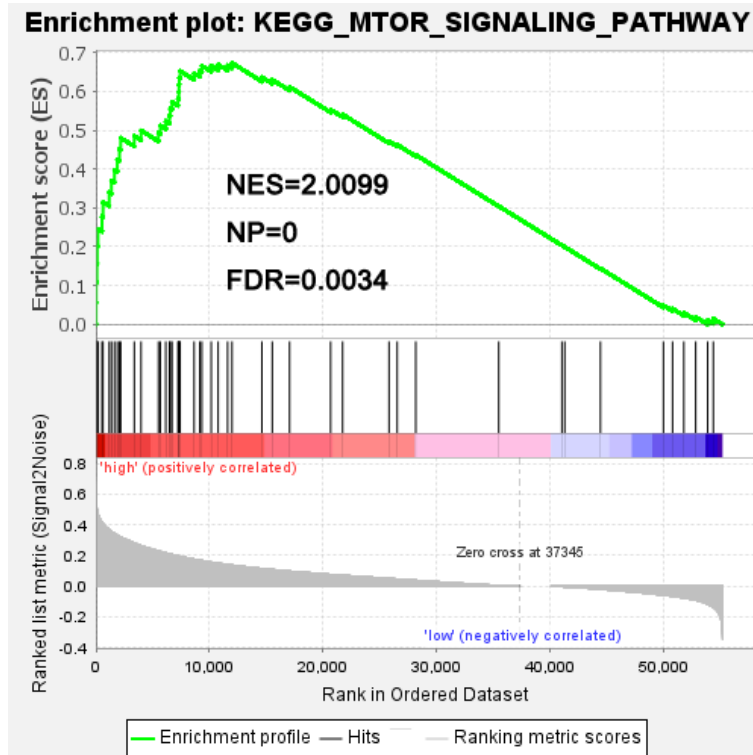

**Supplementary Figure 4 KEGG pathway enrichment analysis indicates a close correlation between LINC00674 and the mTOR signaling pathway in HCC.**
